# Supplementary material for: Therapeutic activity of modified U1 core spliceosomal particles
Source: PubMed Central journal article supplement (PMC4822034; doi:10.1038/ncomms11168), 2016-04-04
Supplement: ncomms11168-s1.pdf [file ncomms11168-s1.pdf]

**a**

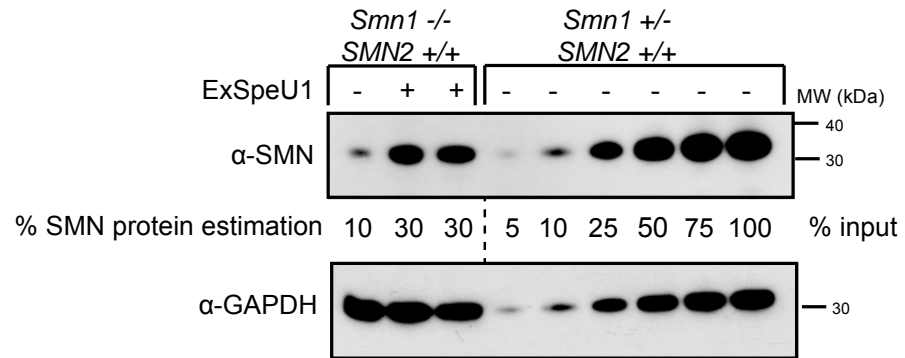

**b**

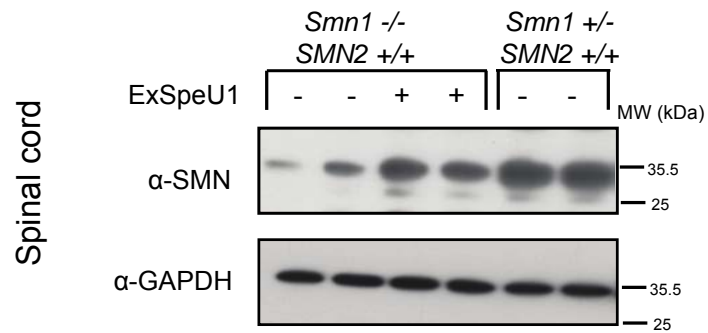

**Supplementary Figure 1. SMN protein expression levels in brain and spinal cord.**

**a** SMN protein levels estimation by Western Blotting in brain **b** SMN protein levels detected by Western Blotting in Spinal cord. Analysis is performed on SMA-affected (*Smn1*<sup>-/-</sup>, *SMN2*<sup>+/+</sup>), SMA-rescued (*Smn1*<sup>-/-</sup>, *SMN2*<sup>+/+</sup>; ExSpeU1 +/−), and control animals (*Smn1*<sup>+/-</sup>, *SMN2*<sup>+/+</sup>, ExSpeU1+/-) at P2-3. alfa-GAPDH was used as internal control.

**a**

|                   | Gene ID       | log2FoldChange | pvalue   |
|-------------------|---------------|----------------|----------|
| Up regulated<br>↑ | 1700001G11Rik | -2.37          | 1.49E-09 |
|                   | Rgp1          | -2.13          | 7.25E-07 |
|                   | 9330162012Rik | -2.12          | 1.03E-06 |
|                   | Cnbd2         | -1.99          | 9.50E-06 |
|                   | Nt5c2         | -1.98          | 4.80E-06 |
|                   | Mrpl48        | -1.86          | 5.61E-05 |
|                   | Ptges3l       | -1.73          | 1.12E-04 |
|                   | Armc6         | -1.73          | 7.02E-05 |
|                   | Grin3b        | -1.69          | 7.89E-06 |
|                   | Elf1          | -1.45          | 6.94E-05 |
|                   | Gabpa         | -1.33          | 3.49E-05 |
|                   | Down<br>↓     | Ubc            | 1.61     |

**b**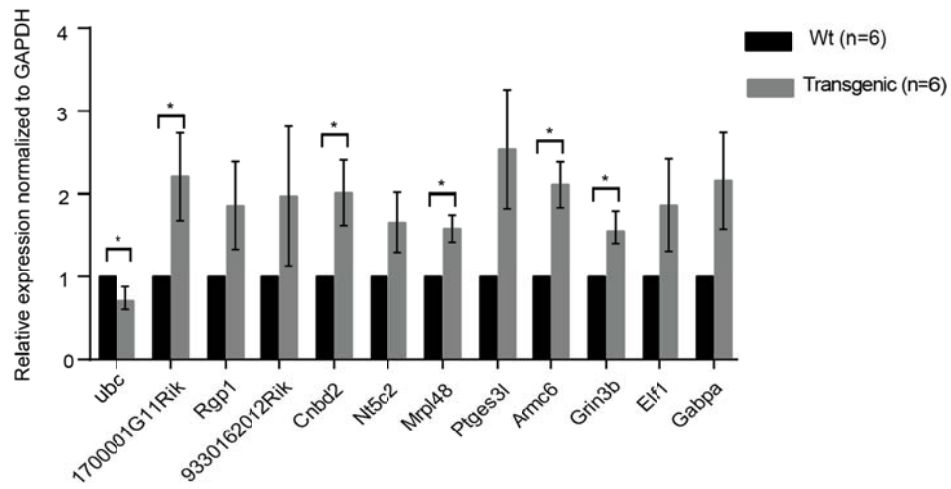**c**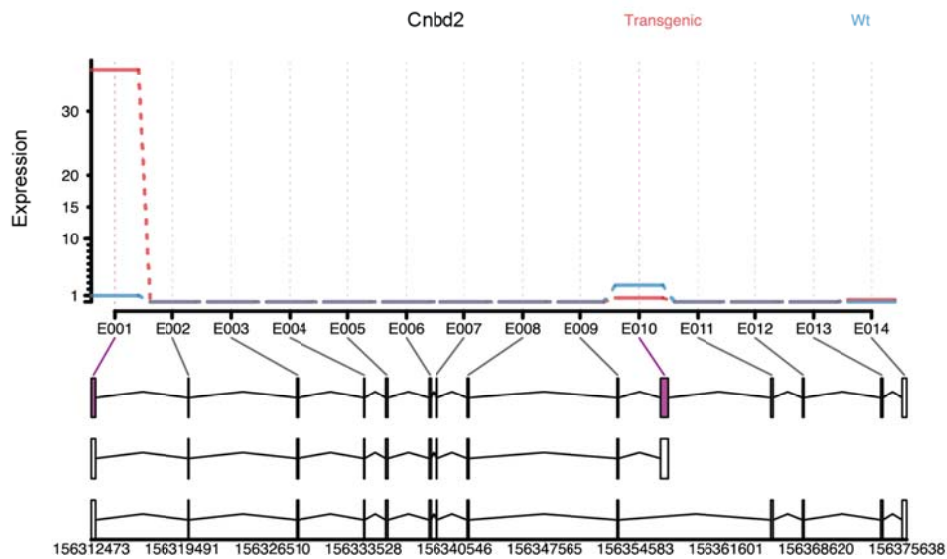

## **Supplementary Fig. 2 Candidate genes and exons identified in RNAseq**

**a** Transcriptional changes in spinal cord of wild type (*Smn1*<sup>+/+</sup>, *SMN2*<sup>+/+</sup>, *ExSpeU1*<sup>-/-</sup>) and SM25 *ExSpeU1* transgenic (*Smn1*<sup>+/+</sup>, *SMN2*<sup>+/+</sup>, *ExSpeU1*<sup>+/-</sup>) animals analyzed by applying a threshold of  $\text{Log}_2\text{FC} > \pm 2$  and a multiple testing correction (MTC)  $P$  value  $< 0.05$ . Using this threshold we identified 11 genes that were upregulated and 1 that was downregulated. **b** Validation of transcriptional changes using qRT-PCR. Graph represents relative expression fold changes in transgenic (*Smn1*<sup>+/+</sup>, *SMN2*<sup>+/+</sup>, *ExSpeU1*<sup>+/-</sup>) and wild type (*Smn1*<sup>+/+</sup>, *SMN2*<sup>+/+</sup>, *ExSpeU1*<sup>-/-</sup>) animals. Wt mice were set to 1. Data represent the mean  $\pm$  SD in 6 animal per group (Student  $t$ -test \*  $p \leq 0.05$ ) **c** *Cnbd2* exon plot. Changes shown are represented as log<sub>2</sub>-fold increases in exon reads relative to wild type and SM25 *ExSpeU1* transgenic animals.

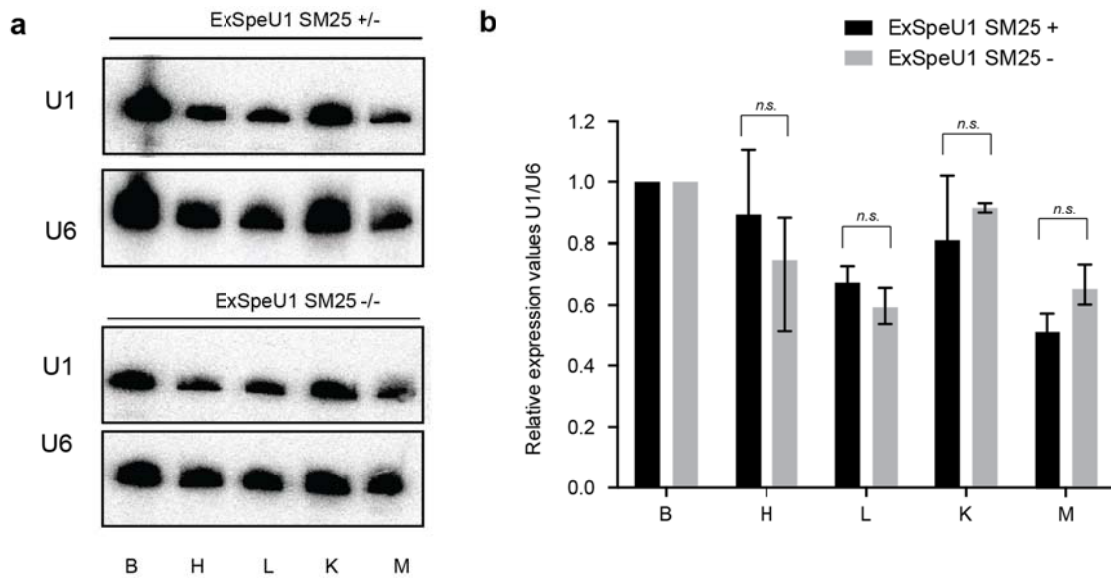

**Supplementary Fig. 3. ExSpeU1 SM25 expression does not affect endogenous U1/U6 snRNA levels in transgenic mice.**

**a** Northern blot hybridization of RNA extracted from five mice tissues of transgenic (*Smn1*<sup>+/+</sup>, *SMN2*<sup>+/+</sup>, *ExSpeU1*<sup>+/-</sup>) and wild type mice (*Smn1*<sup>+/+</sup>, *SMN2*<sup>+/+</sup>, *ExSpeU1*<sup>-/-</sup>) probed for U1 and U6. The histogram shows the quantification of U1/U6 ratio estimated by OptiQuant™ software. Brain ratio was set to 1. Data represent the mean ± SD of expression in four animals (Student t-test, n.s. not significant).

**a**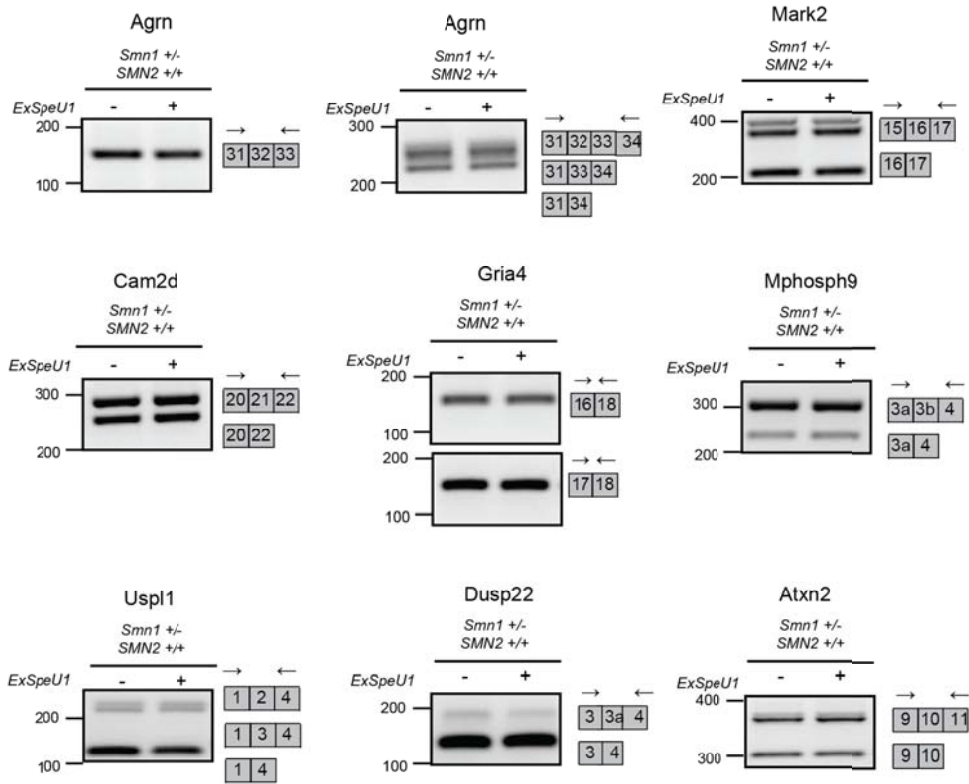**b**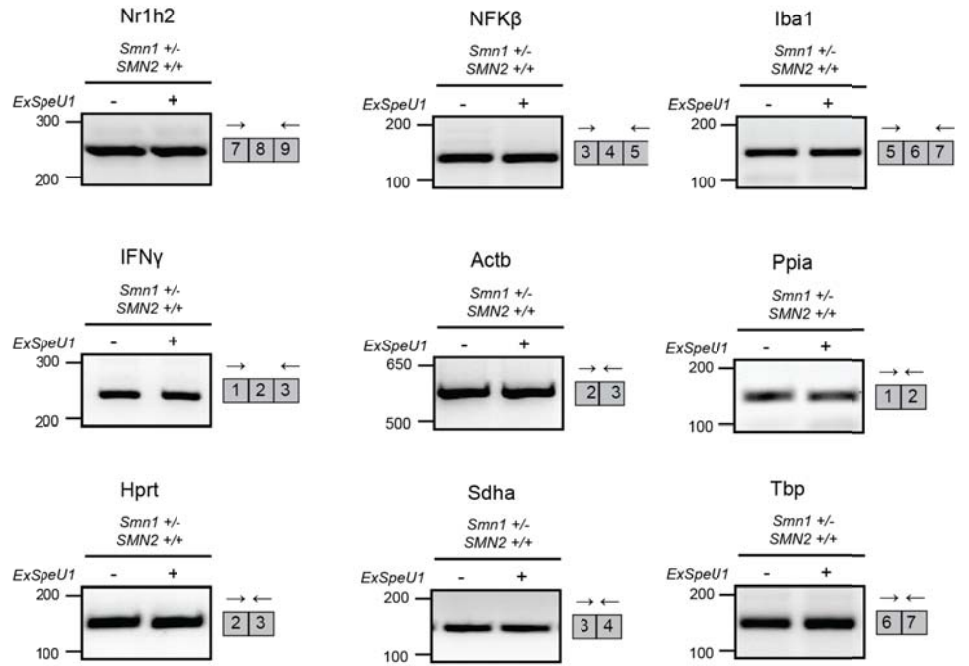

**Supplementary Fig. 4 Profile of alternative and constitutive splicing events in spinal cord of Wt and transgenic mice.**

**a** Alternative splicing events detected by RT-PCR reaction in RNA extracted from spinal cords of transgenic (*Smn1*<sup>+/+</sup>, *SMN2*<sup>+/+</sup>, *ExSpeU1*<sup>+/-</sup>) and wild type (*Smn1*<sup>+/+</sup>, *SMN2*<sup>+/+</sup>, *ExSpeU1*<sup>-/-</sup>) adult animals. Three animals for each group were analysed and no differences were detected. Pictures are representative of obtained pattern of splicing. **b** Constitutive splicing events were analyzed as in **a**. No differences were detected between transgenic and wild type animals.

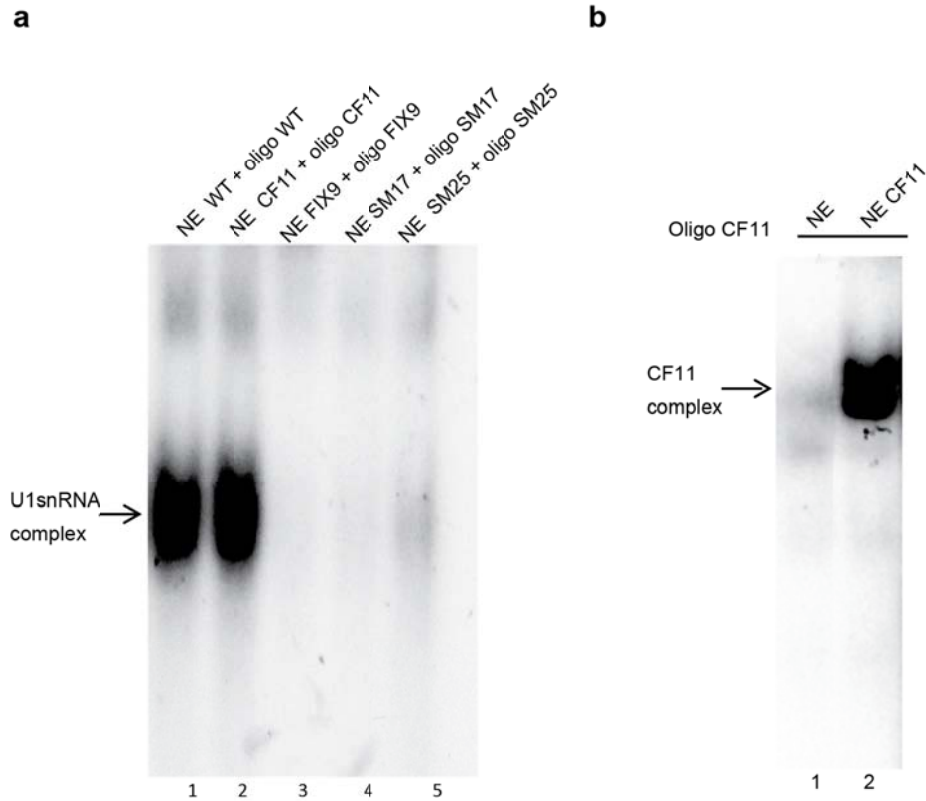

**Supplementary Fig.5. ExSpeU1 snRNP analysis in EMSA.**

**a** Complex formation occurs only for ExSpeU1 CF11. EMSA assay was performed on nuclear extract prepared from untreated HEK293 cells and cells transfected with different ExSpeU1s and incubated with corresponding labelled RNA oligo (WT, CF11, FIX9, SM17 and SM25). **b** CF11 oligonucleotide does not show any complex formation in untreated cells.

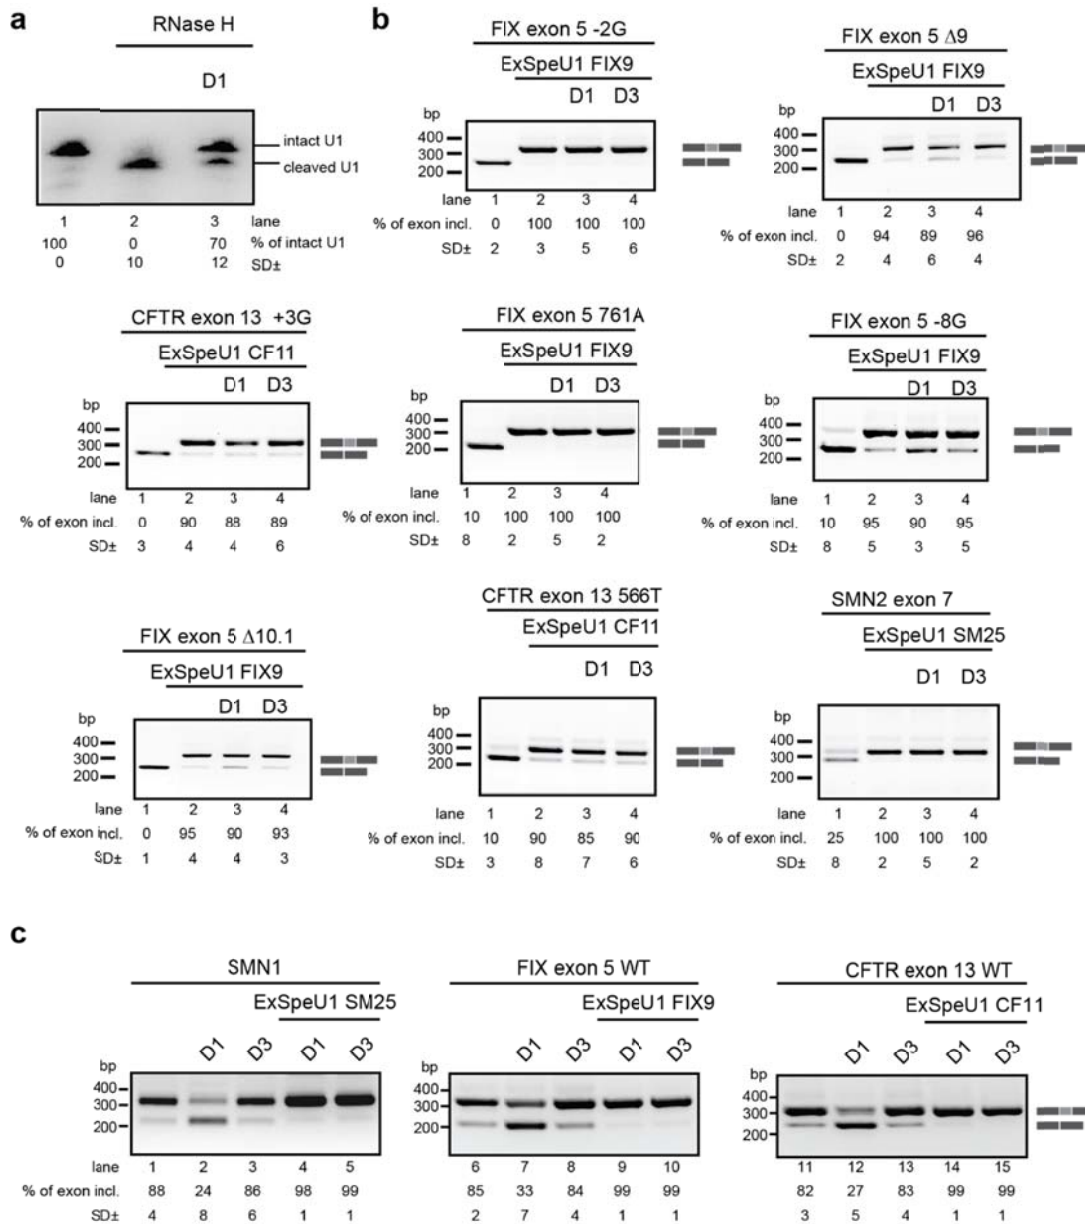

**Supplementary Fig. 6. ExSpeU1-mediated splicing rescue does not require endogenous U1 snRNP.**

a D1 treatment masks ~70% of endogenous U1snRNP. HeLa cells were transfected with 850ng of D1 or control D3 plasmids for 24 hrs. RNase H protection assay was performed using total cell extracts and U1 snRNA was detected by northern blotting



using internal probe. Quantification was performed by OptiQuant™ software. Data represent the mean  $\pm$  SD of 3 experiments. **b** Analysis of spliced transcripts of mutated **(b)** and wild type **(c)** minigenes co-transfected with ExSpeU1 and decoy plasmid. HeLa cells were transfected with 850ng of D1 or D3 plasmids and with 500ng of corresponding ExSpeU1s as indicated. The splicing pattern was evaluated by RT-PCR. Percentage of exon inclusion was quantified by ImageJ. Data represent the means  $\pm$  SD of three independent experiments done in duplicate.

**a**

|                          | SM 25 5'tail                                                 | loop I |
|--------------------------|--------------------------------------------------------------|--------|
| ExSpeU1 SM25 L4mut       | TACAAAAGTAAGATTGAGCAggggagataccaTGATCACGAGGTggttttccaggggcg  |        |
|                          |                                                              |        |
| ExSpeU1 SM25 L4mut short | TACAAAAGTAAGATTGAGCAggggagataccaTGATCACGAGGTggttttccaggggcg  |        |
|                          |                                                              |        |
|                          | loop II                                                      |        |
| ExSpeU1 SM25 L4mut       | aggcttatccATTGCATCCTGGatgtgctgacccctgogatttccccaaatgtgggaaac |        |
|                          |                                                              |        |
| ExSpeU1 SM25 L4mut short | aggcttatccATTGCATCCTGGatgtgctgacccctgogatttccccaaatgtgggaaac |        |
|                          |                                                              |        |
|                          | loop IV mut                                                  |        |
| ExSpeU1 SM25 L4mut       | tcgactgcataatttggtagtgGGAIACITATTTCGATMITTAICCTg             | 170    |
|                          |                                                              |        |
| ExSpeU1 SM25 L4mut short | tcgactgcataatttggtagtgGGAIACITIA-----                        | 153    |

-----  
16-18bp

**b**

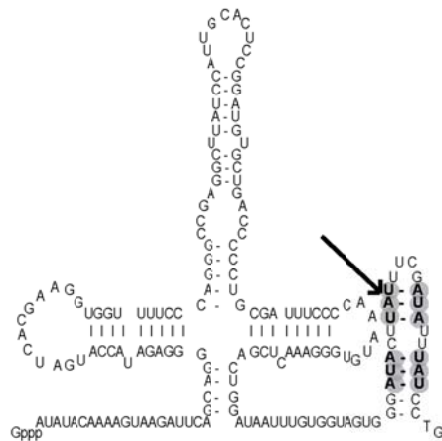

**Supplementary Fig. 7. The SM25 SL4 mutant is processed to a truncated U1 RNA isoforms that lacks the last ~16-18 nucleotides.**

**a** Sequence alignment of the two ExSpeU1 SM25 L4mut isoforms. To determine the nucleotide composition of two full length and short isoforms identified in Northern Blotting (Fig 5 b) we performed 3'adapter ligation with total RNA. RT-PCR was performed using primer specific for ExSpeU1 SM25 and the 3'adapter. PCR products were cloned into pUC vector and ten positive clones were sequenced. **b** Schematic representation of ExSpeU1 SM25 L4 mutant secondary structure. Arrow indicates the end of the shorter isoform.

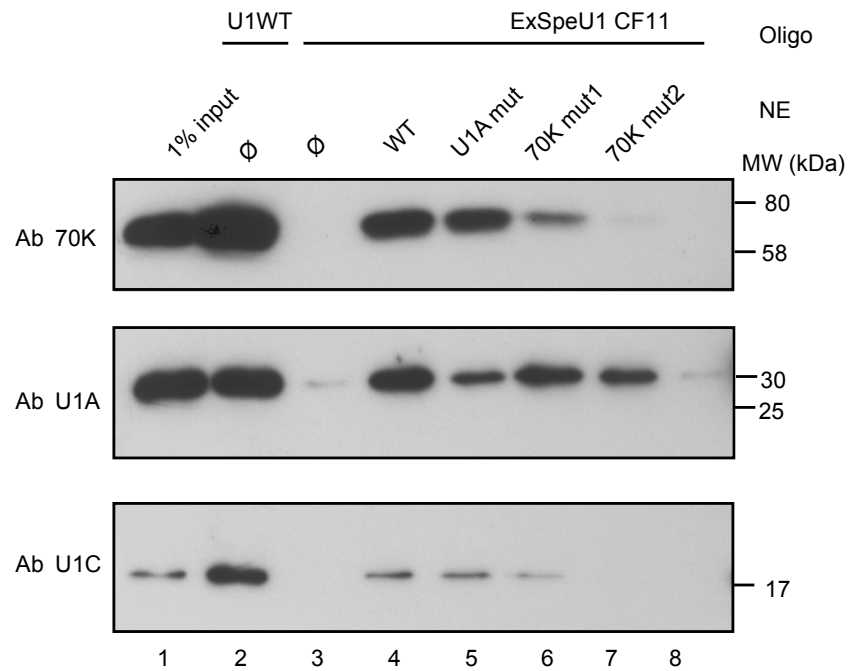

**Supplementary Fig. 8. Affinity purification of ExSpeU1 CF11 mutants.**

ExSpeU1 CF11 was affinity-purified from nuclear extract prepared from HEK293 cells transfected with WT, U1A, 70K, or MS2 mutants. Proteins were analyzed on 8% SDS-PAGE followed by WB to detect 70K, U1A and U1C. [For uncropped gels see Supplementary Figure 16.](#)

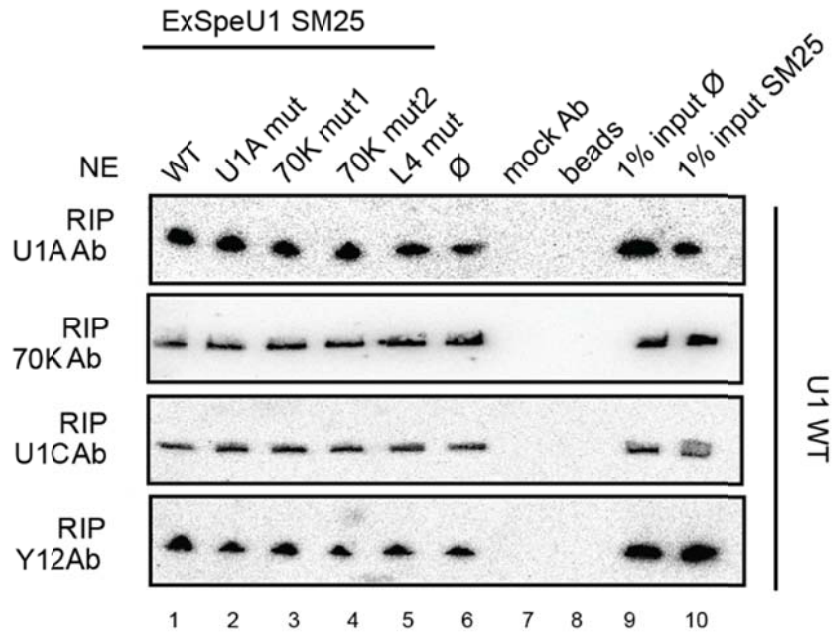

**Supplementary Fig. 9. Detection of endogenous U1 snRNA in RNA-IP experiments.**

Membranes from RNA immunoprecipitation assay (Fig. 5f) were stripped and re-probed for U1 snRNA, as an internal control.

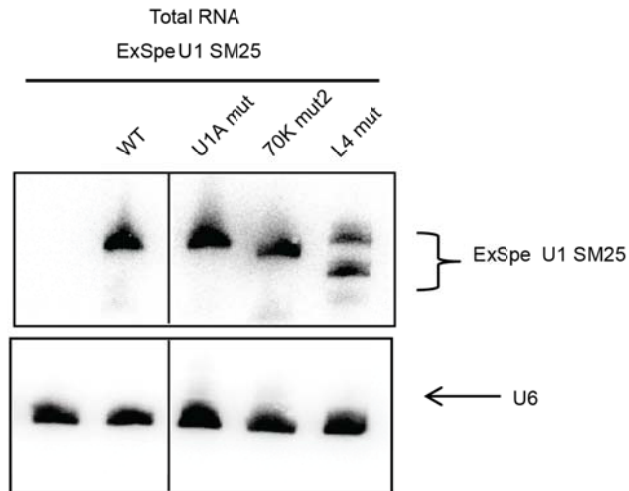

**Supplementary Fig. 10. ExSpeU1 SM25 mutants are expressed in the same amount as wild-type particle in co-transfection experiments.**

Northern blot hybridization of RNA extracted from cells transfected with 250 ng of ExSpeU1 SM25 and 500 ng of its mutated variants. Membranes were probed for U1 ExSpeU1 SM25 and U6 snRNA as a loading control.

Fig 1c

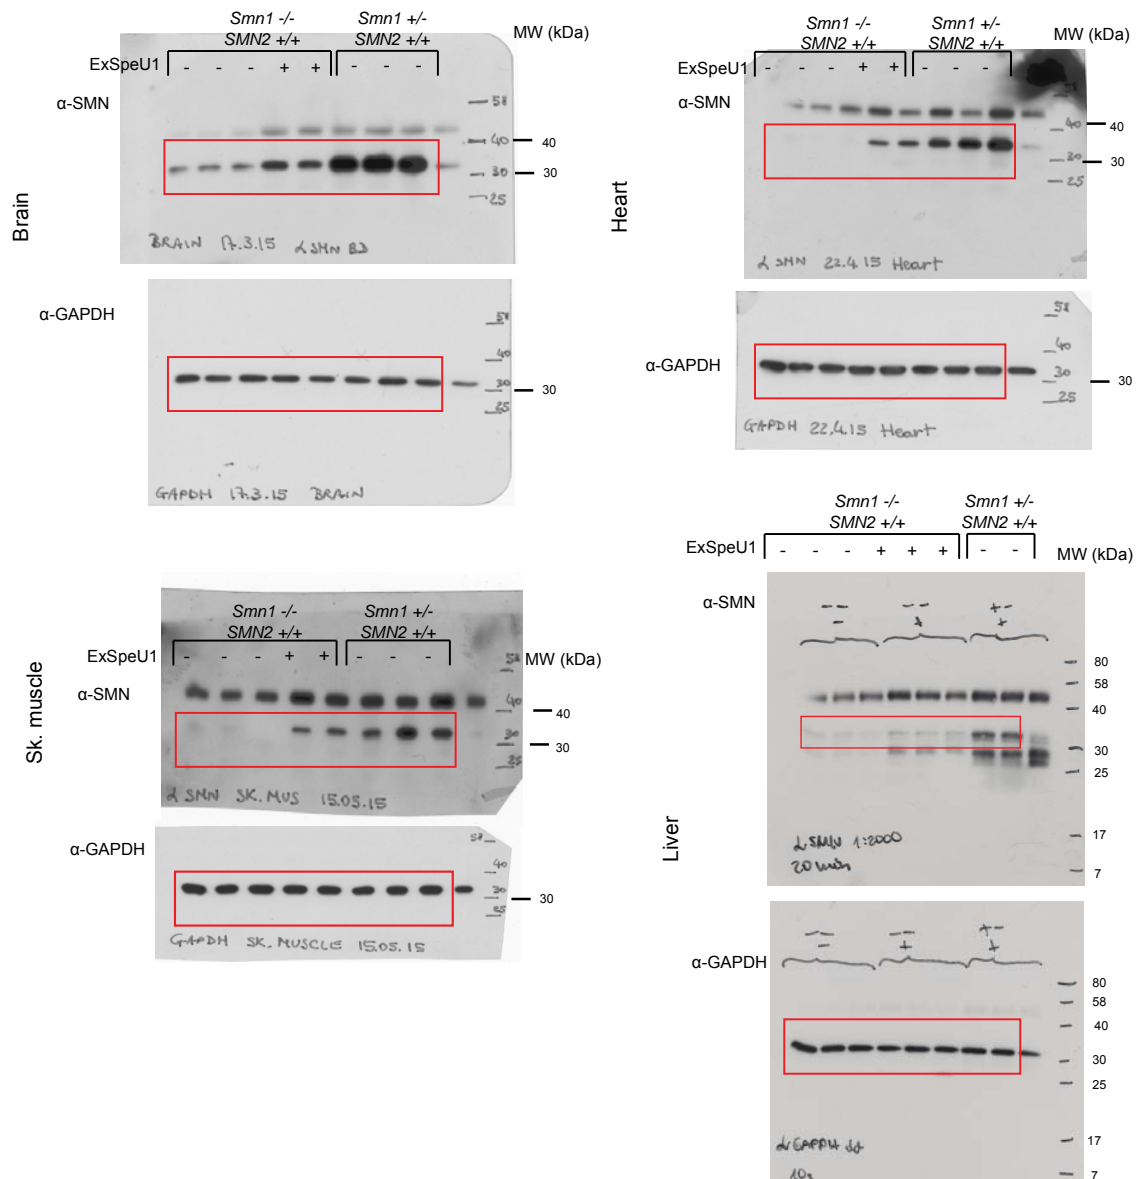

Supplementary Fig. 11a Uncropped gels related to Fig 1

Uncropped gels Fig 4

Fig 4b

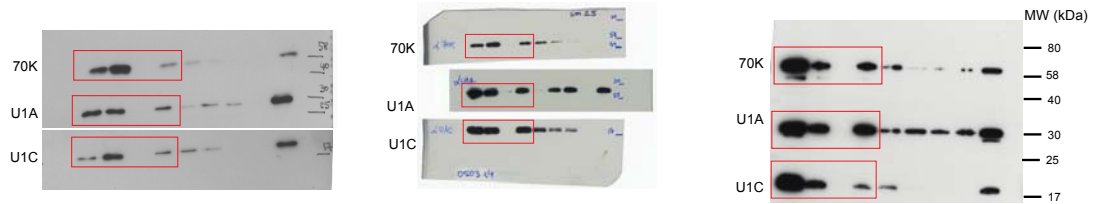

Fig 4c

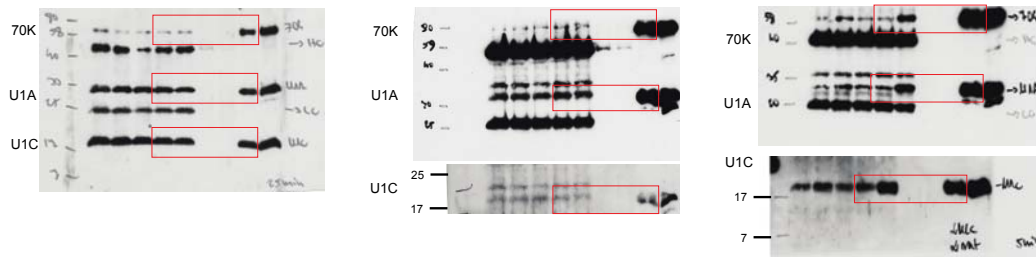

Supplementary Fig. 11b. Uncropped gels related to Fig 4

Uncropped gels Fig 5

Fig 5c

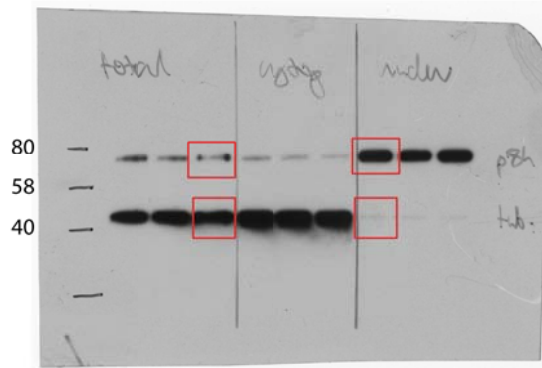

Fig 5e

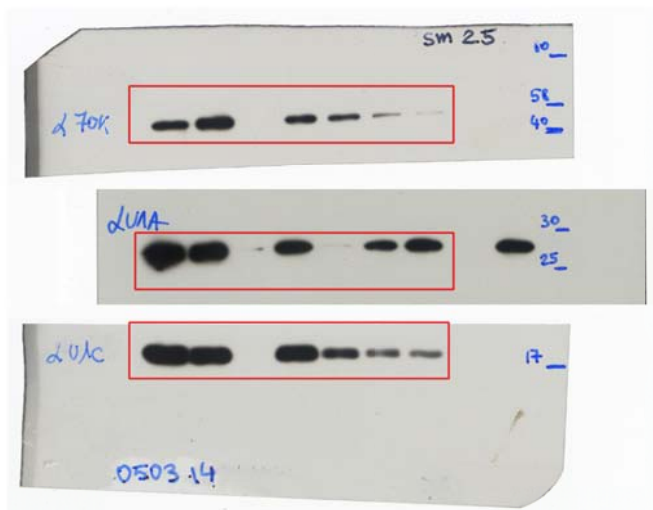

**Supplementary Fig. 11c. Uncropped gels related to Fig 5**



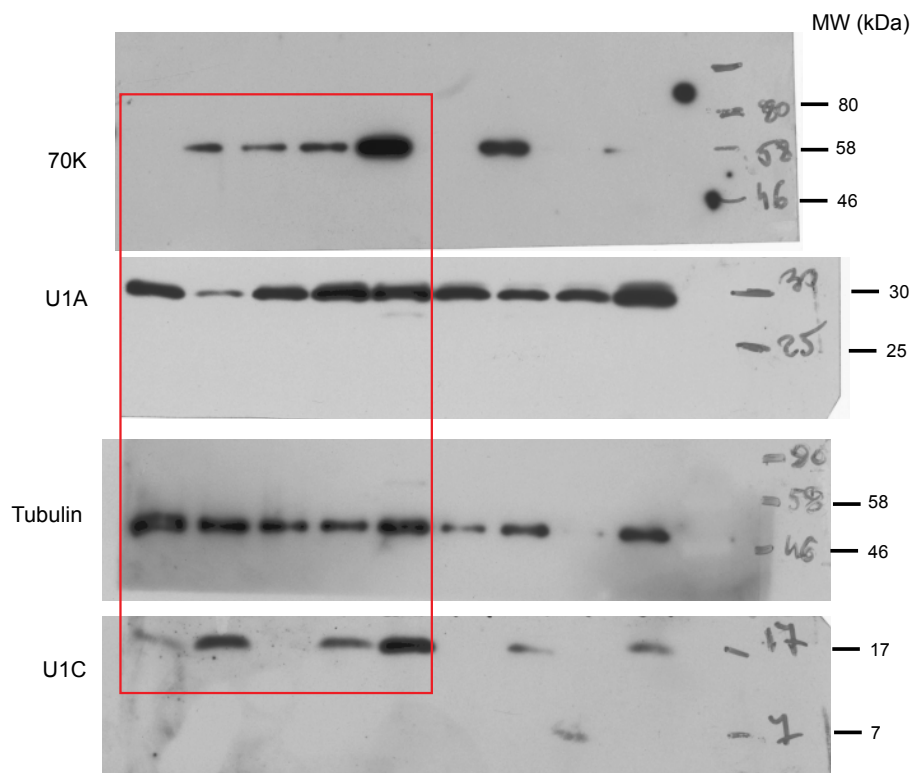

Supplementary Fig. 11d. Uncropped gels related to Fig 6

Supplementary Fig 1a

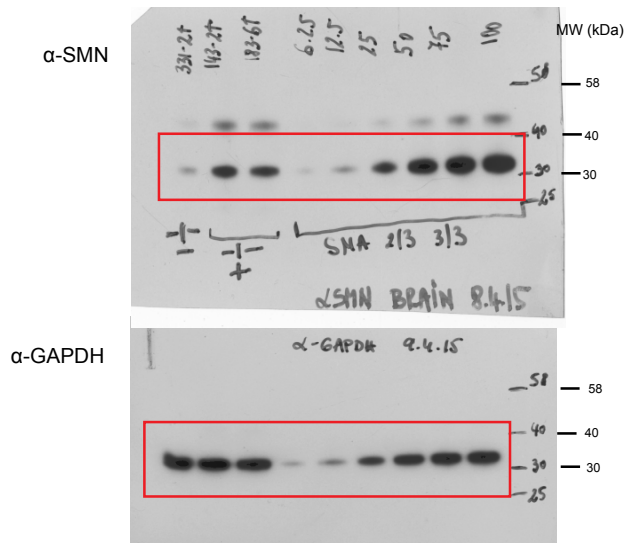

Supplementary Fig 1b

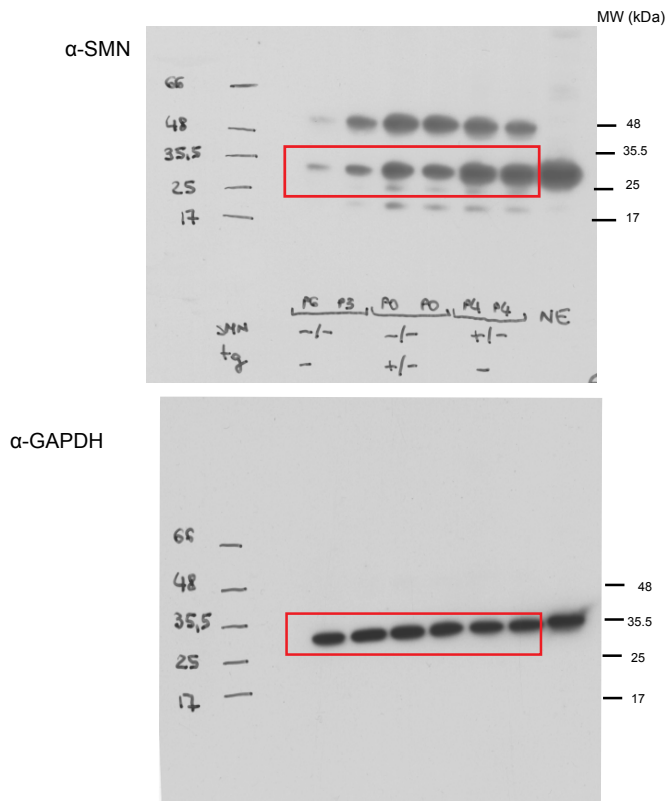

Supplementary Fig. 11e. Uncropped gels related to Supplementary Fig 1

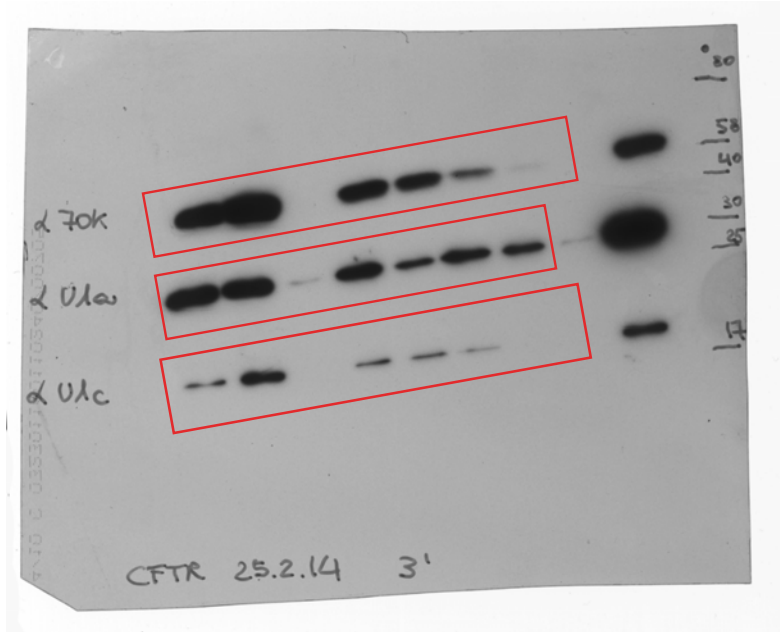

Supplementary Fig. 11f. Uncropped gels related to Supplementary Fig. 8

**Supplementary Table 1: Primers and oligonucleotides**

| Gene to identify                                           | PCR primer name | 5'-3' sequence                                                                           |
|------------------------------------------------------------|-----------------|------------------------------------------------------------------------------------------|
| <b>Primers used for cloning</b>                            |                 |                                                                                          |
| U1 mutants                                                 | U1Amutfor       | GAGGCTTATCCCTTAGACTCCGGATGTGC                                                            |
|                                                            | U1Amutrev       | CTCCGAATAGGGAATCTGAGGCCTACACG                                                            |
|                                                            | L4for           | CATAATTTGTGGTAGTGATATACTTATTTTCGATATTTATA<br>TTGACTTTCTGGAG                              |
|                                                            | L4rev           | CTCCAGAAAAGTCAATATAAATATCGAAATAAGTATATCA<br>CTACCACAAATTATG                              |
|                                                            | U1215for        | CGTGCTTCACCACGAACCAGTTCC                                                                 |
|                                                            | SP6rev          | ATTTAGGTGACACTATAG                                                                       |
| ExSpeU1<br>CF11                                            | CF11for         | GATCTCATAAGTAAGGTATTCAGCAGGGGAGATACCAT                                                   |
|                                                            | CF11rev         | GATCATGGTATCTCCCCTGCTGAATACCTTACTTATGA                                                   |
|                                                            | CF1170Km1       | CCCAAGATCTCATAAGTAAGGTATTCAGCAGGGGAGAT<br>ACCATTGACACG                                   |
|                                                            | CF1170Km2       | CCCAAGATCTCATAAGTAAGGTATTCAGCAGGCCTGAT<br>ACACCATCAGGGTTCAGGCAGGGCGAGGC                  |
| ExSpeU1<br>FIX9                                            | FIX9for         | GATCTCATTCTTATTCAGGCAGGGGAGATACCAT                                                       |
|                                                            | FIX9rev         | GATCATGGTATCTCCCCTGCCTGAATAAGAATGA                                                       |
|                                                            | FIX9for70Km1    | CCCAAGATCTCATTCTTATTCAGGCAGGGGAGATACCA<br>TTGACACG                                       |
|                                                            | FIX9for70Km2    | CCCAAGATCTCATTCTTATTCAGGCAGGCCTGATACAC<br>CATCAGGGTTCAGGCAGGGCGAGGC                      |
| ExSpeU1<br>SM25                                            | SM25for         | GATCTCATATACAAAAGTAAGATTCAGCAGGGGAGATA<br>CCAT                                           |
|                                                            | SM25rev         | GATCATGGTATCTCCCCTGCTGAATCTTACTTTTGTATA<br>TGA                                           |
|                                                            | SM2570Km1       | CCCAAGATCTCATATACAAAAGTAAGATTCAGCAGGGG<br>AGATACCATTGACACG                               |
|                                                            | SM2570Km1       | CCCAAGATCTCATATACAAAAGTAAGATTCAGCAGGCC<br>TGATACACCATCAGGGTTCAGGCAGGGCGAGGC              |
| <b>Primers used for minigene splicing assay</b>            |                 |                                                                                          |
| pTB                                                        | Alfa2-3         | CAACTTCAACTCCTAAGCCACTGC                                                                 |
|                                                            | Bra2            | GTCACCAGGAAGTTGGTTAAATCA                                                                 |
| SMN                                                        | PClfor          | GACTCACTATAGGCTAGCCTCG                                                                   |
|                                                            | E8-75rev        | AAGTACTTACCTGTAACGCTTCACATTCCAGATCTGTC                                                   |
| <b>Animal model</b>                                        |                 |                                                                                          |
| ExSpeU1<br>genotyping                                      | MT97            | CCTGTAAGGATGTGTGAATG                                                                     |
|                                                            | MT98            | ATACTAGCCATCTCTTTGG                                                                      |
|                                                            | MT63            | TACACTTGCCAGCGCCCTAG                                                                     |
| Smn1<br>genotyping                                         | oIMR7208        | CTCCGGGATATTGGGATTG                                                                      |
|                                                            | oIMR7210        | GGTAACGCCAGGGTTTTCC                                                                      |
|                                                            | oIMR7271        | TTTCTTCTGGCTGTGCCTTT                                                                     |
| SMN2<br>genotyping                                         | oIMR5065        | CTGACCTACCAGGGATGAGG                                                                     |
|                                                            | oIMR5066        | GGTCTGTTCTACAGCCACAGC                                                                    |
|                                                            | oIMR5067        | CCCAGGTGGTTTATAGACTCAGA                                                                  |
| SMN2<br>RT-PCR                                             | MT26            | GATGCTGATGCTTTGGGAAGT                                                                    |
|                                                            | MT28            | TCTGATCGTTTCTTATGTTGGTGC                                                                 |
| Inverse<br>PCR                                             | MT65            | GCCCTGTAGCGGCGCATTAA                                                                     |
|                                                            | U1160rev        | GGAAAGCGCGAACGCAGTC                                                                      |
| <b>Oligo used for silencing (siGNOME Smart pool siRNA)</b> |                 |                                                                                          |
| 70K                                                        |                 | GAGAGUGAAUUUAUGACACA<br>GUACGGACCUAUCAAAGA<br>GCCGUACAUUCGAGAGUUU<br>GAGACAUGCACUCCGCUUA |
| U1A                                                        |                 | GCCCCUAACCACACUAUUUA                                                                     |

|                                                              |                                                                                           |
|--------------------------------------------------------------|-------------------------------------------------------------------------------------------|
|                                                              | GCCCCUAACCACACUAUUUA<br>UCAAGAAGGAUGAGCUAAA<br>UGACAAACCUAUGCGUAUC                        |
| U1C                                                          | AUAAAAGACUAUUUAUCAGA<br>AAACAACGGCUGCAUUUCA<br>AAAGAUACCUCCUACUCCA<br>UAUUGUGACUACUGCGAUA |
| <b>RNA oligos complementary to 5' tails of studied U1</b>    |                                                                                           |
| WT                                                           | 3' UAUGAAUGGUCCG 5'                                                                       |
| CF11                                                         | 3' UAUUCAUCCAUAGU 5'                                                                      |
| FIX9                                                         | 3' UAAGAAUAAGAC 5'                                                                        |
| SM25                                                         | 3' UAUGUUUUCAUUCUAAGU 5'                                                                  |
| <b>Primers used for RNAseq validation</b>                    |                                                                                           |
| GAPDH                                                        | F 5'AAGGGCTCATGACCACAGTC 3'<br>R 5'ACACATTGGGGGTAGGAACA 3'                                |
| Elf1                                                         | F 5' CCAAGTATTAGGACTATACAGG 3'<br>R 5' GGCTATAACCGTTGTGAGTG 3'                            |
| Gapda                                                        | F 5' CCGGGACCTTACCCTGCTAC 3'<br>R 5' TCTCAGTCCCGTCGATCTCA 3'                              |
| Grin3                                                        | F 5' GAGGTCTGTGCCAGGTTCTG 3'<br>R 5' ATGGTCTCCAGGGGACTAGC 3'                              |
| Ubc                                                          | F 5' GCCCAGTGTTACCACCAAGA 3'<br>R 5' CCCATCACACCCAAGAACA 3'                               |
| Rgp1                                                         | F 5' ACCAGCTTCTCTCTCCCCAT 3'<br>R 5' AATGGCGGCAGAAAGTACCAA 3'                             |
| Mrpl48                                                       | F 5' GCTGGGTGTGTGGACCAATA 3'<br>R 5' TTTGGGCTCCTGCACTTTCA 3'                              |
| Cndb                                                         | F 5' GCTGGGTGACGAAGTTCAGA 3'<br>R 5' CACAGTTGCCCTGGCAGATA 3'                              |
| Ptges3l                                                      | F 5' CGTGTTTCCAGCTGCAGGAAT 3'<br>R 5' TCAGCTCCACCTCATCGTCTC 3'                            |
| Nt5c2                                                        | F 5' AGCGACTGCGAGCGGAAG 3'<br>R 5' CACTCCAGGAGGTCGTCATCT 3'                               |
| Armc6                                                        | F 5' AGG CCT GAA GGT GCT CAT TG 3'<br>R 5' CGA GGT CCT GGT GGT CAT TG 3'                  |
| 1700001G11Rik                                                | F 5' GCGTTGTCCCTGCTGAAGAT 3'<br>R 5' GACAGATCCTTCCGCCTTGG 3'                              |
| 9330162012Rik                                                | F 5' ATGTCGGATGCTCACCTGTC 3'<br>R 5' GAACCGATCACTGAGCCACA 3'                              |
| <b>Primer used for splicing analysis in mice spinal cord</b> |                                                                                           |
| Nr1h2                                                        | F 5' TTGTGGACTTTGCCAAGCAG 3'<br>R 5' GCGATAAGCAAGGCATACTC 3'                              |
| NFKβ                                                         | F 5' AGCAGGACATGGGATTTTCAAG 3'<br>R 5' TAGGTGGATGATGGCTAAGTG 3'                           |
| Iba1                                                         | F 5' AATGATGAGGATCTGCCGTC 3'<br>R 5' AGTCAGAGTAGCTGAACG 3'                                |
| IFNγ                                                         | F 5' CACGGCACAGTCATTGAAAG 3'<br>R 5' TTGCTGATGGCCTGATTGTC 3'                              |
| Actb                                                         | F 5' CATGTTTGAGACCTTCAACA 3'<br>R 5' ATCTCCTTCTGCATCCTGTC 3'                              |
| Ppia                                                         | F 5' CAGACGCCACTGTCGCTT 3'<br>R 5' TGCTTTTGGAACTTTGTCTGCAA 3'                             |

|      |                                                                |
|------|----------------------------------------------------------------|
| Hprt | F 5' TTGCTCGAGATGTCATGAAGG 3'<br>R 5' TGAGAGATCATCTCCACCAAT 3' |
| Sdha | F 5' GCTTGCGAGCTGCATTTGG 3'<br>R 5' CATCTCCAGTTGCCTCTTCC 3'    |
| Tbp  | F 5' CTCAGTTACAGGTGGCAGCA 3'<br>R 5' ACCAACAATCACCAACAGCA 3'   |
